# Supplementary material for: Autism candidate gene DIP2A regulates spine morphogenesis via acetylation of cortactin
Source: PubMed Central journal article supplement (PMC6786517; doi:10.1371/journal.pbio.3000461), 2019-10-10

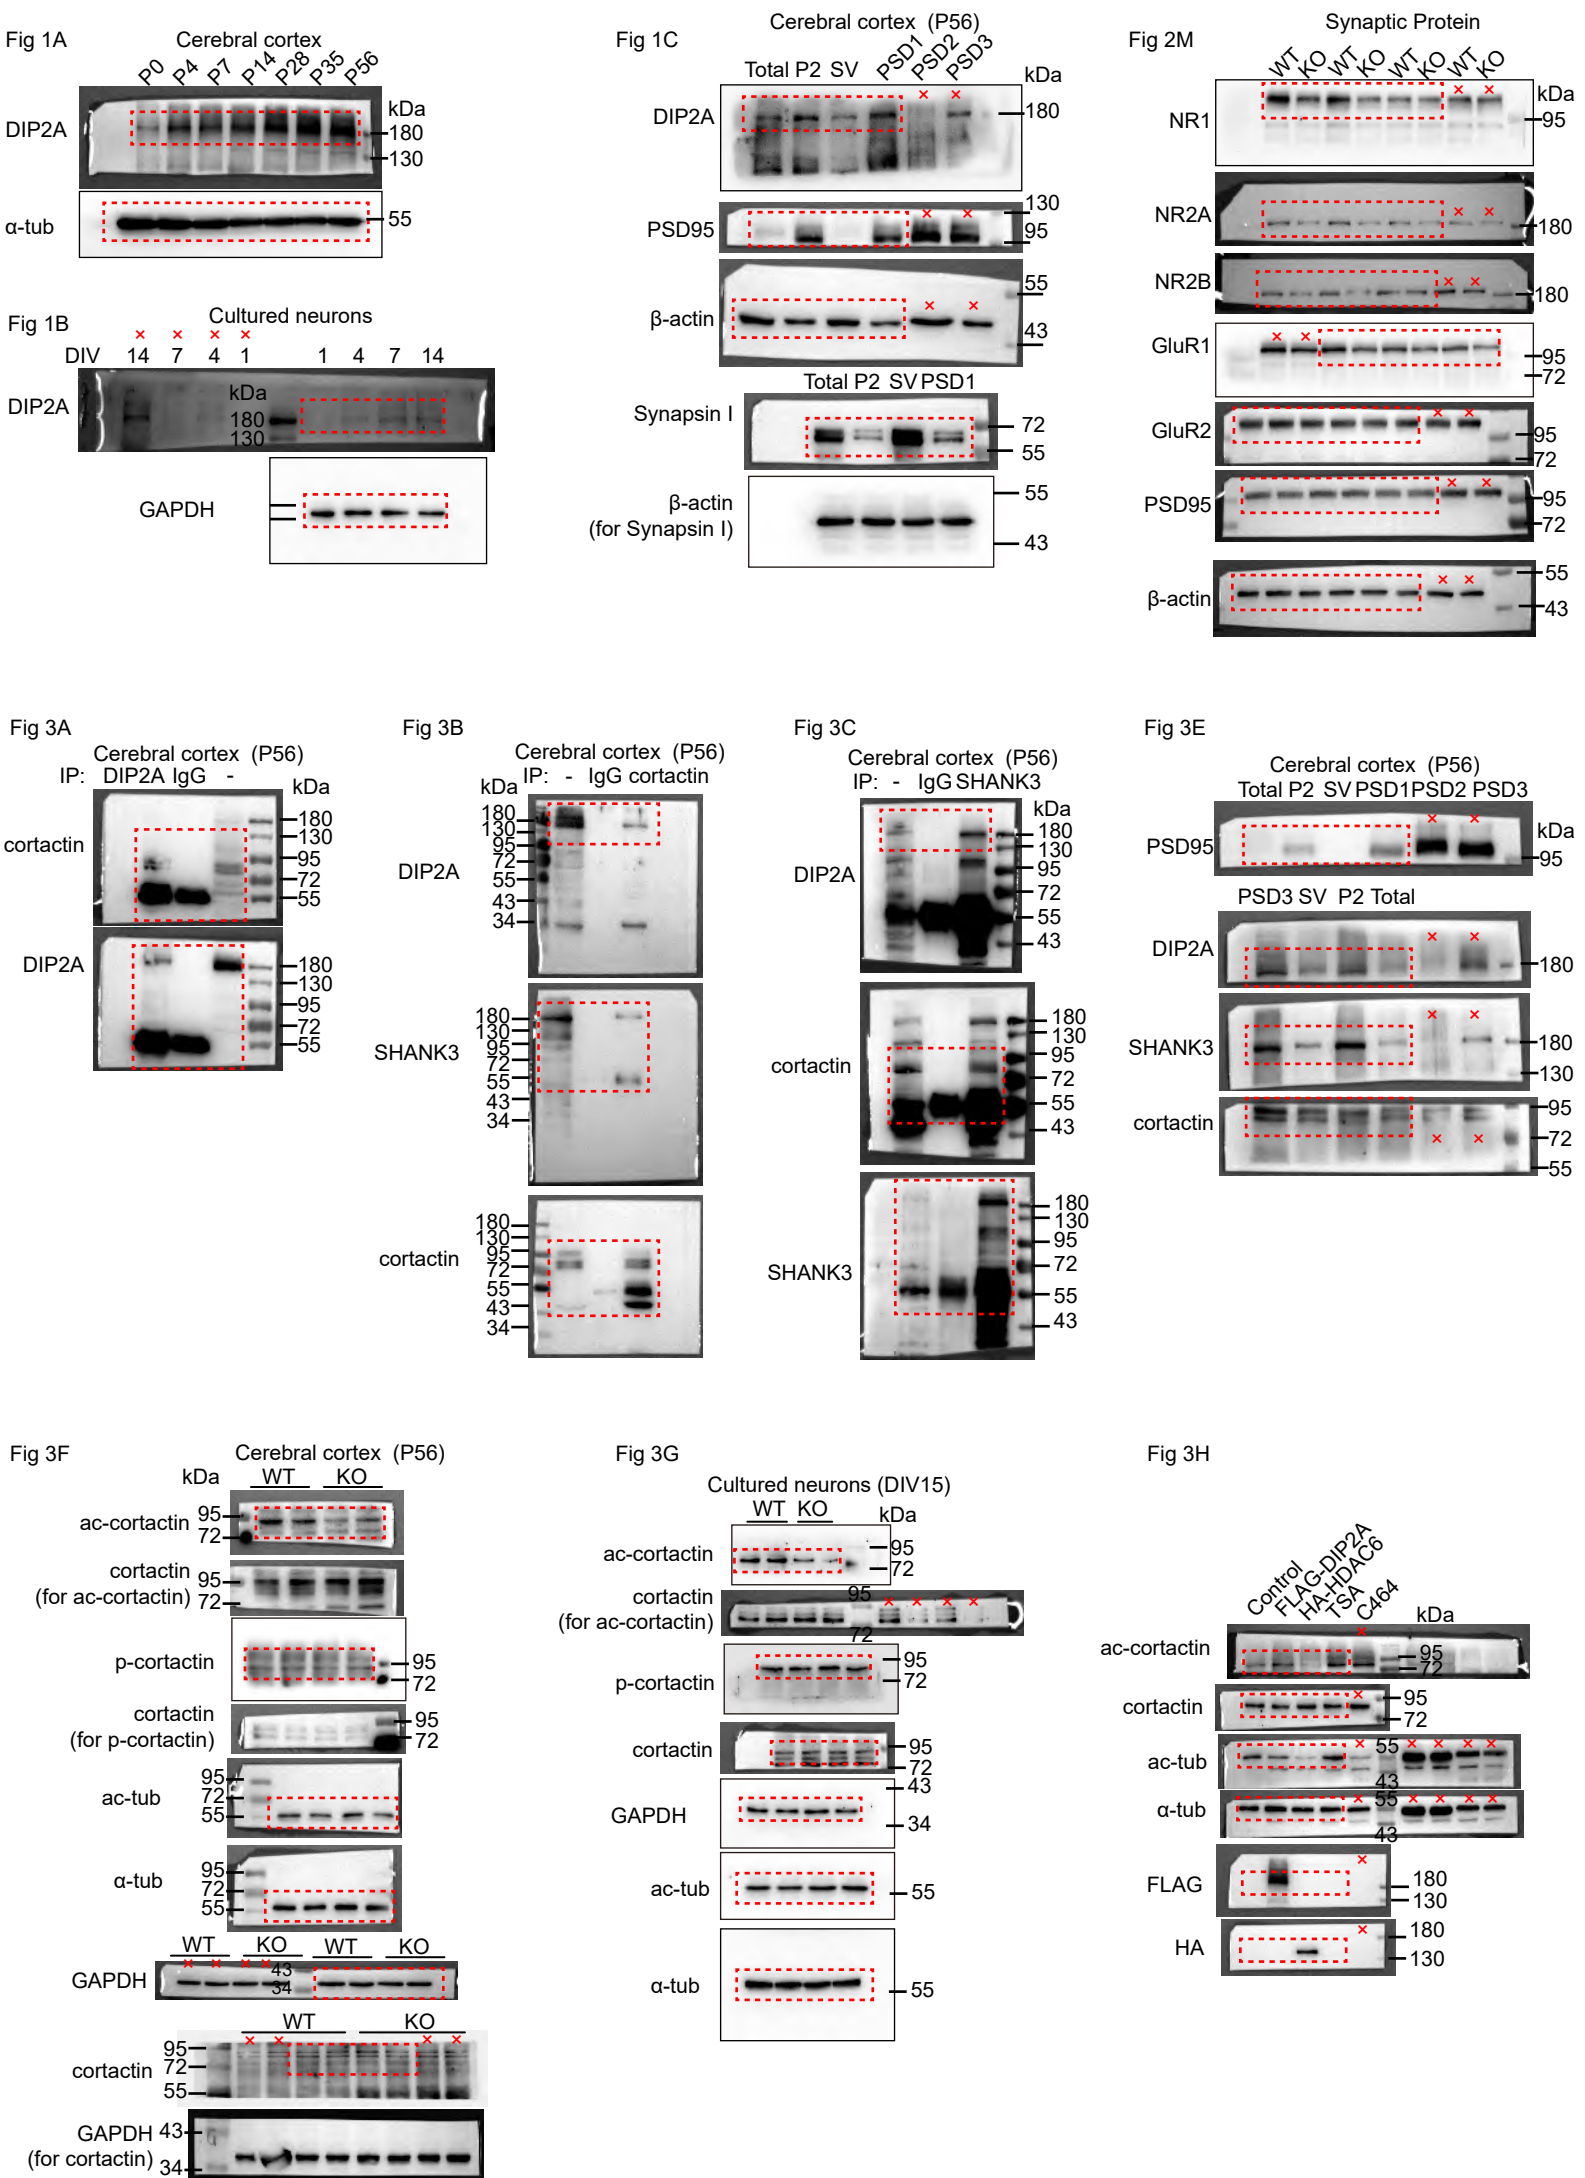

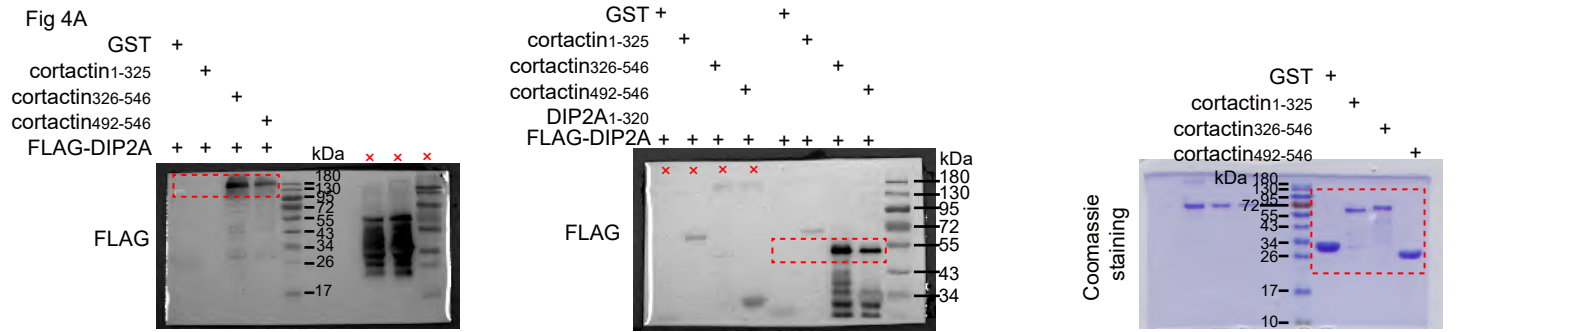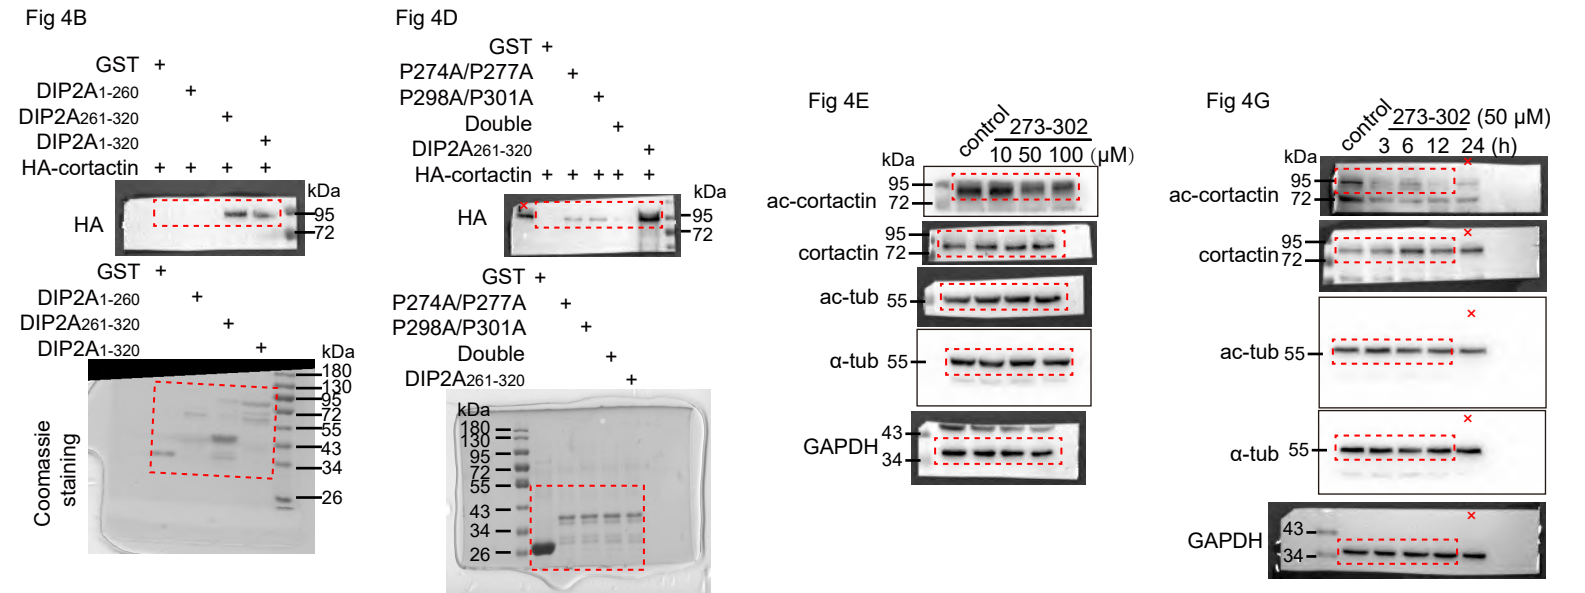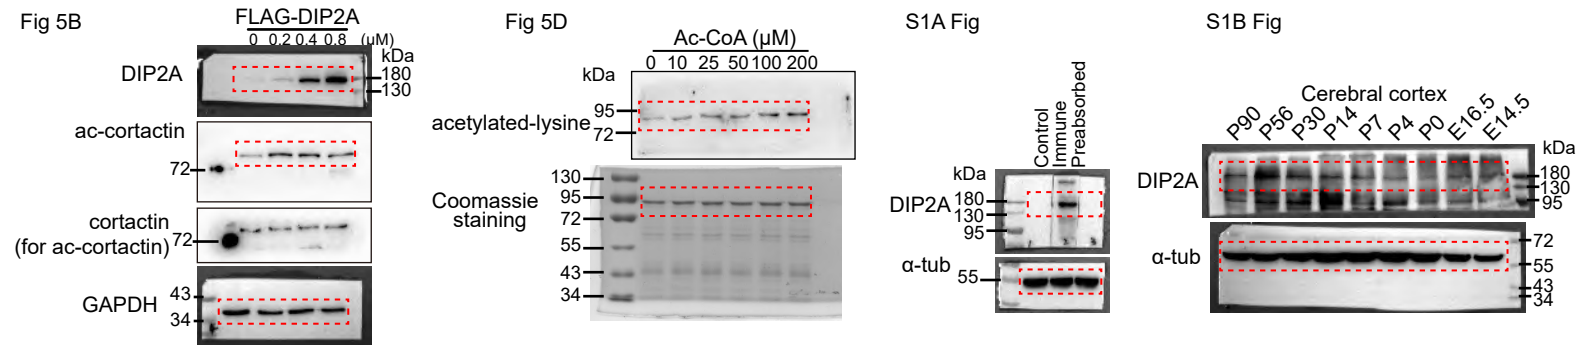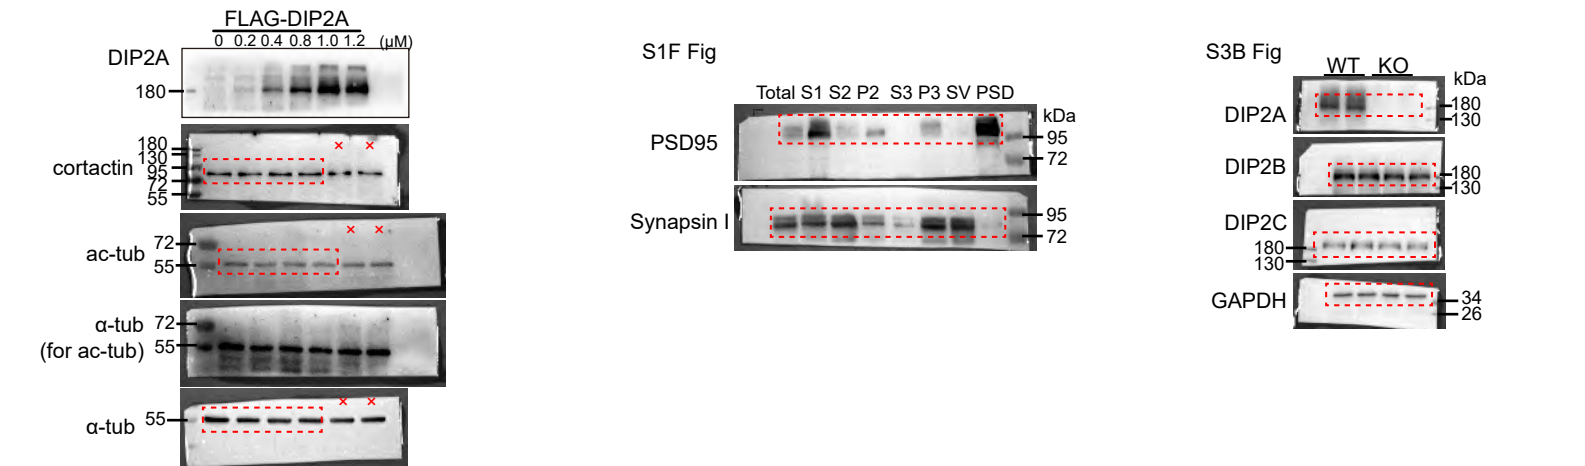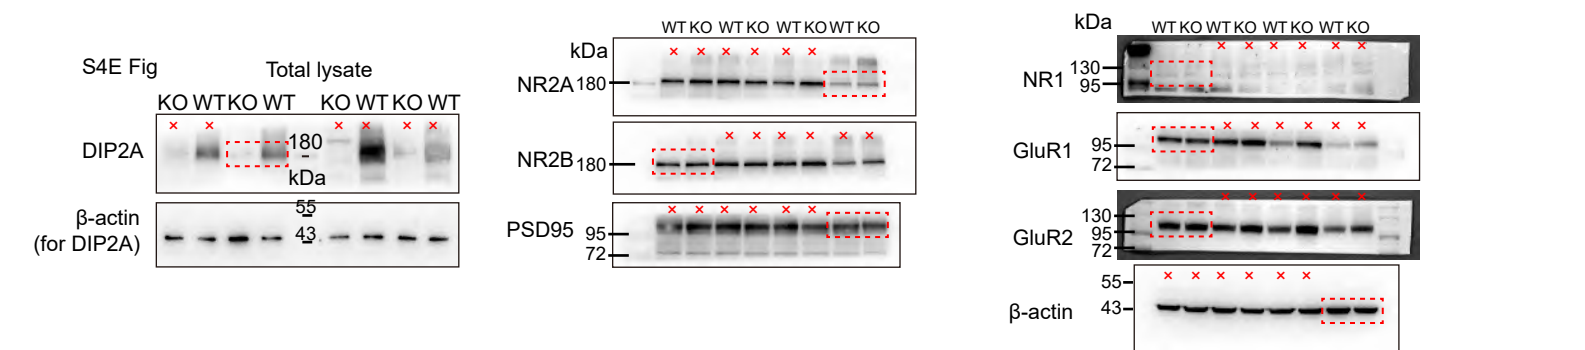

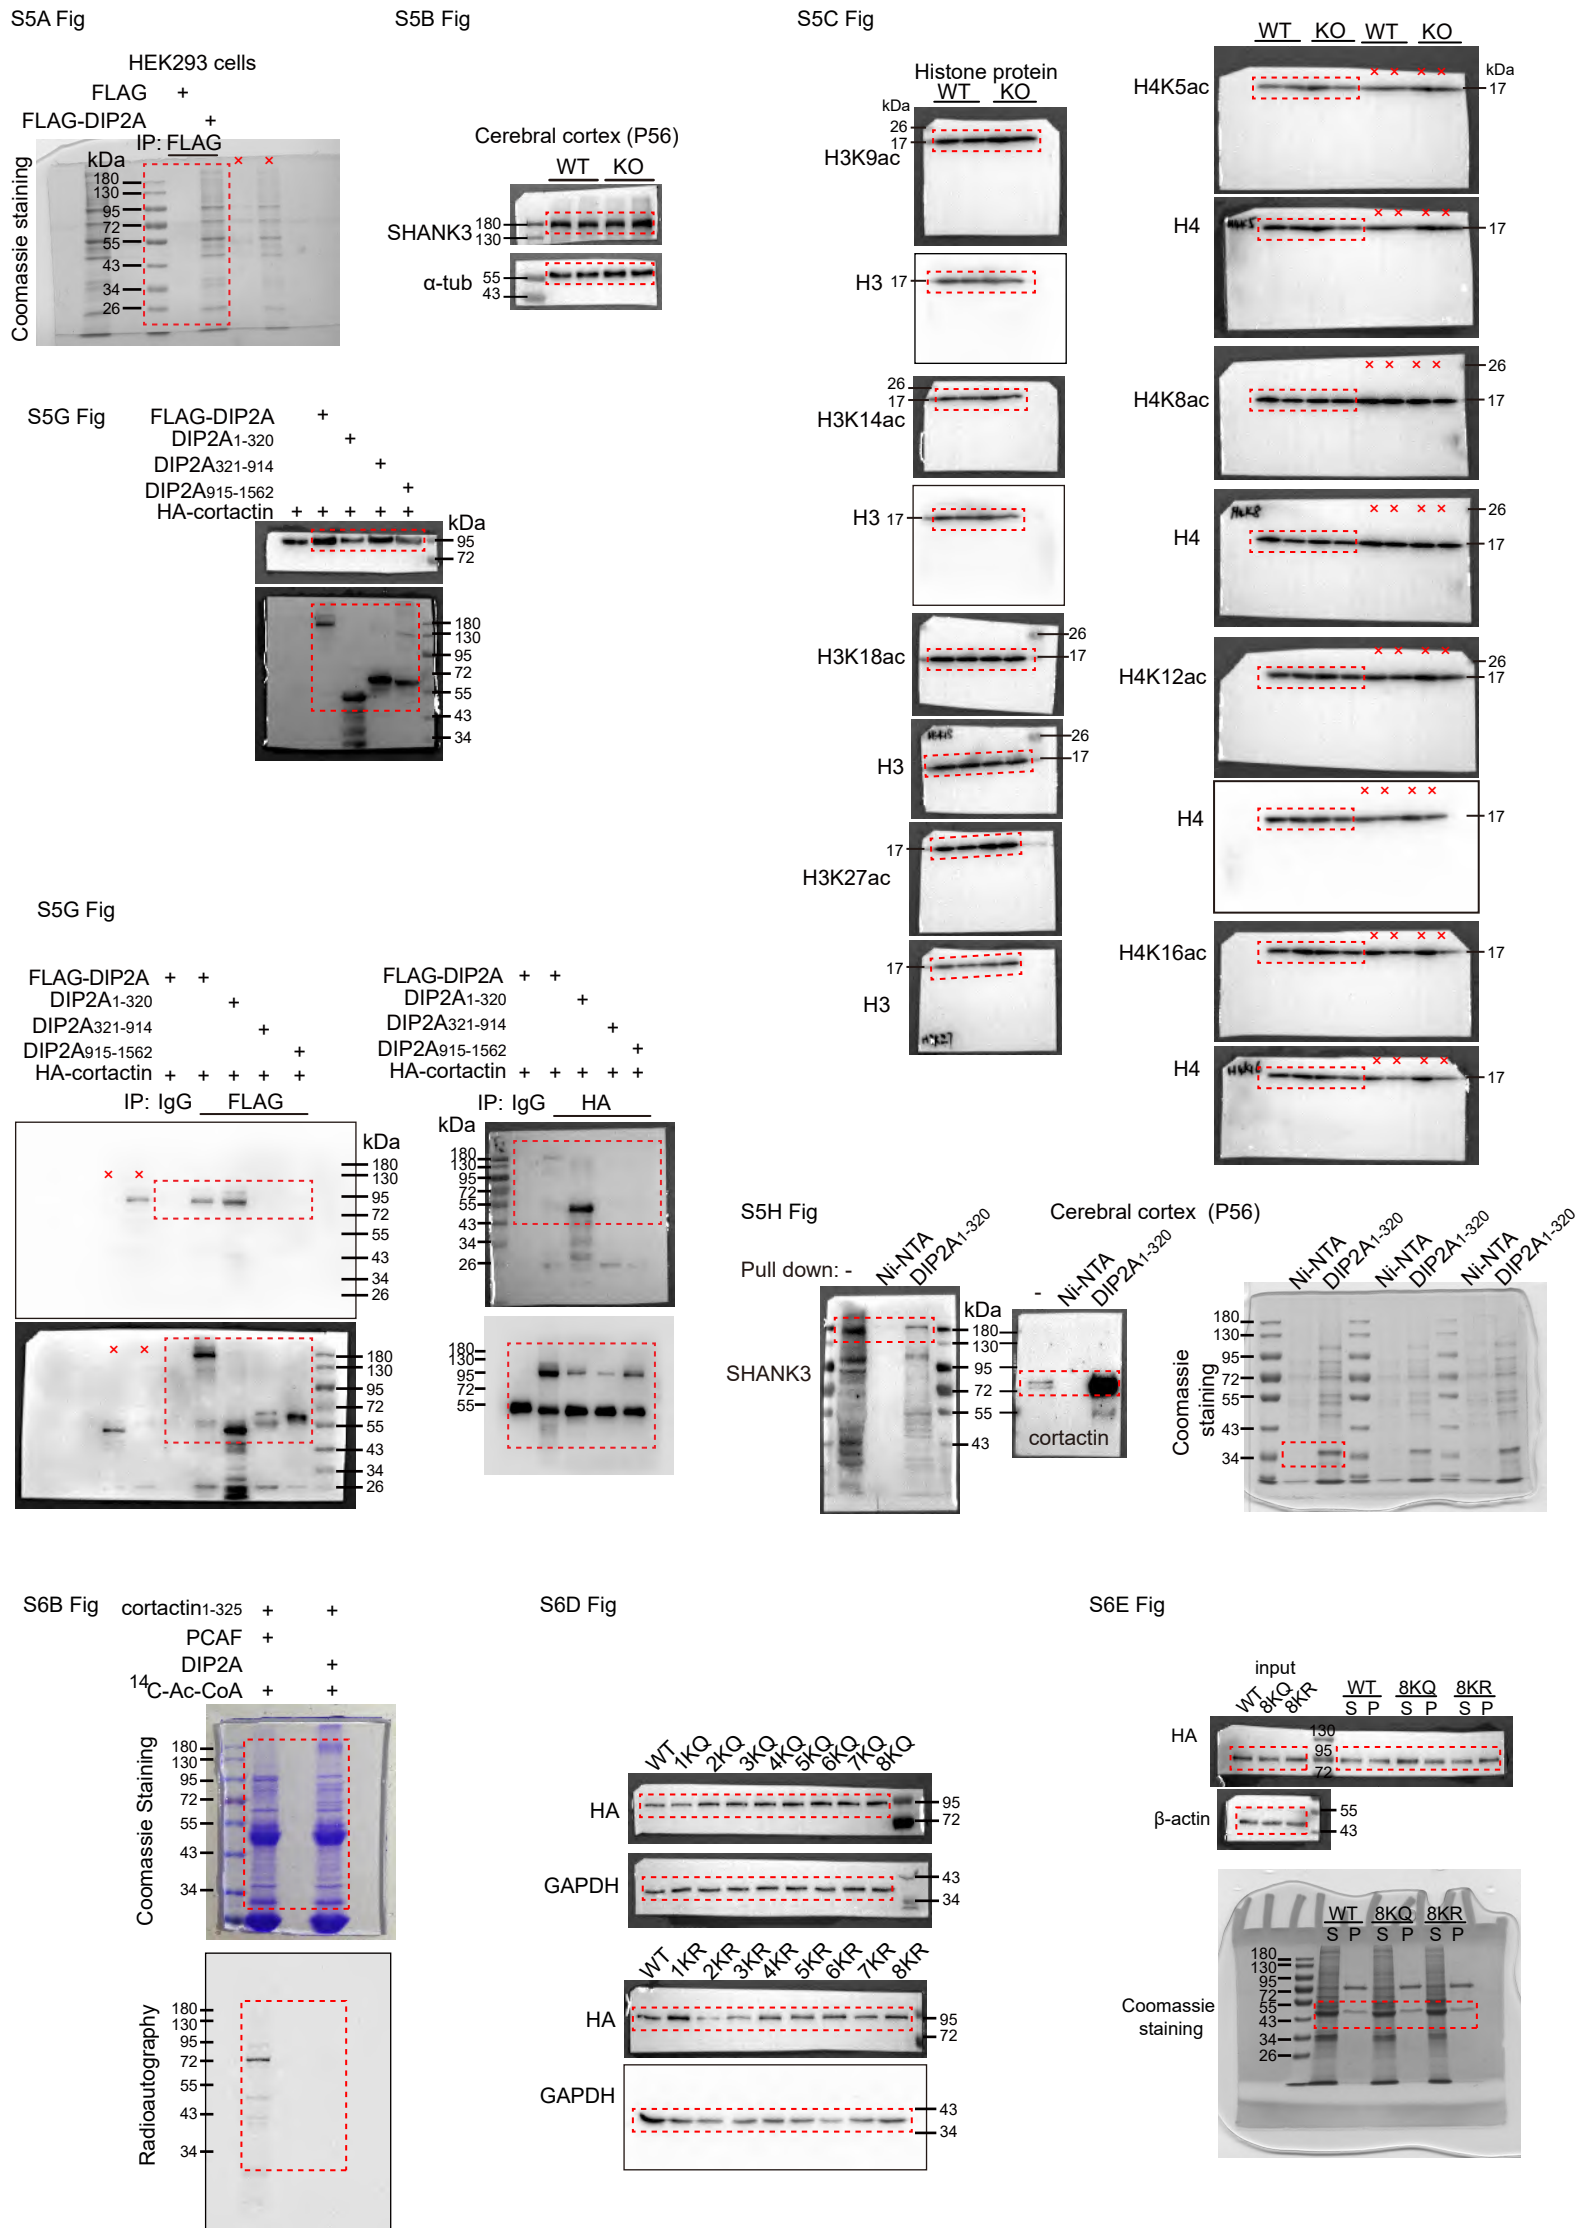

Supplement: pbio.3000461.s004.pdf [file pbio.3000461.s004.pdf]
